# Supplementary material for: A high-performance Co-MOF non-enzymatic electrochemical sensor for glucose detection
Source: Royal Society of Chemistry journal article supplement (doi:10.1039/d1nj04480j), 2021-01-01
Supplement: d1nj04480j1.pdf [file d1nj04480j1.pdf]

## A high-performance Co-MOF non-enzymatic electrochemical sensor for glucose detection

Zhen-Zhen Ma, Yao Ma, Bing Liu, Ling Xu,\* Huan Jiao\*

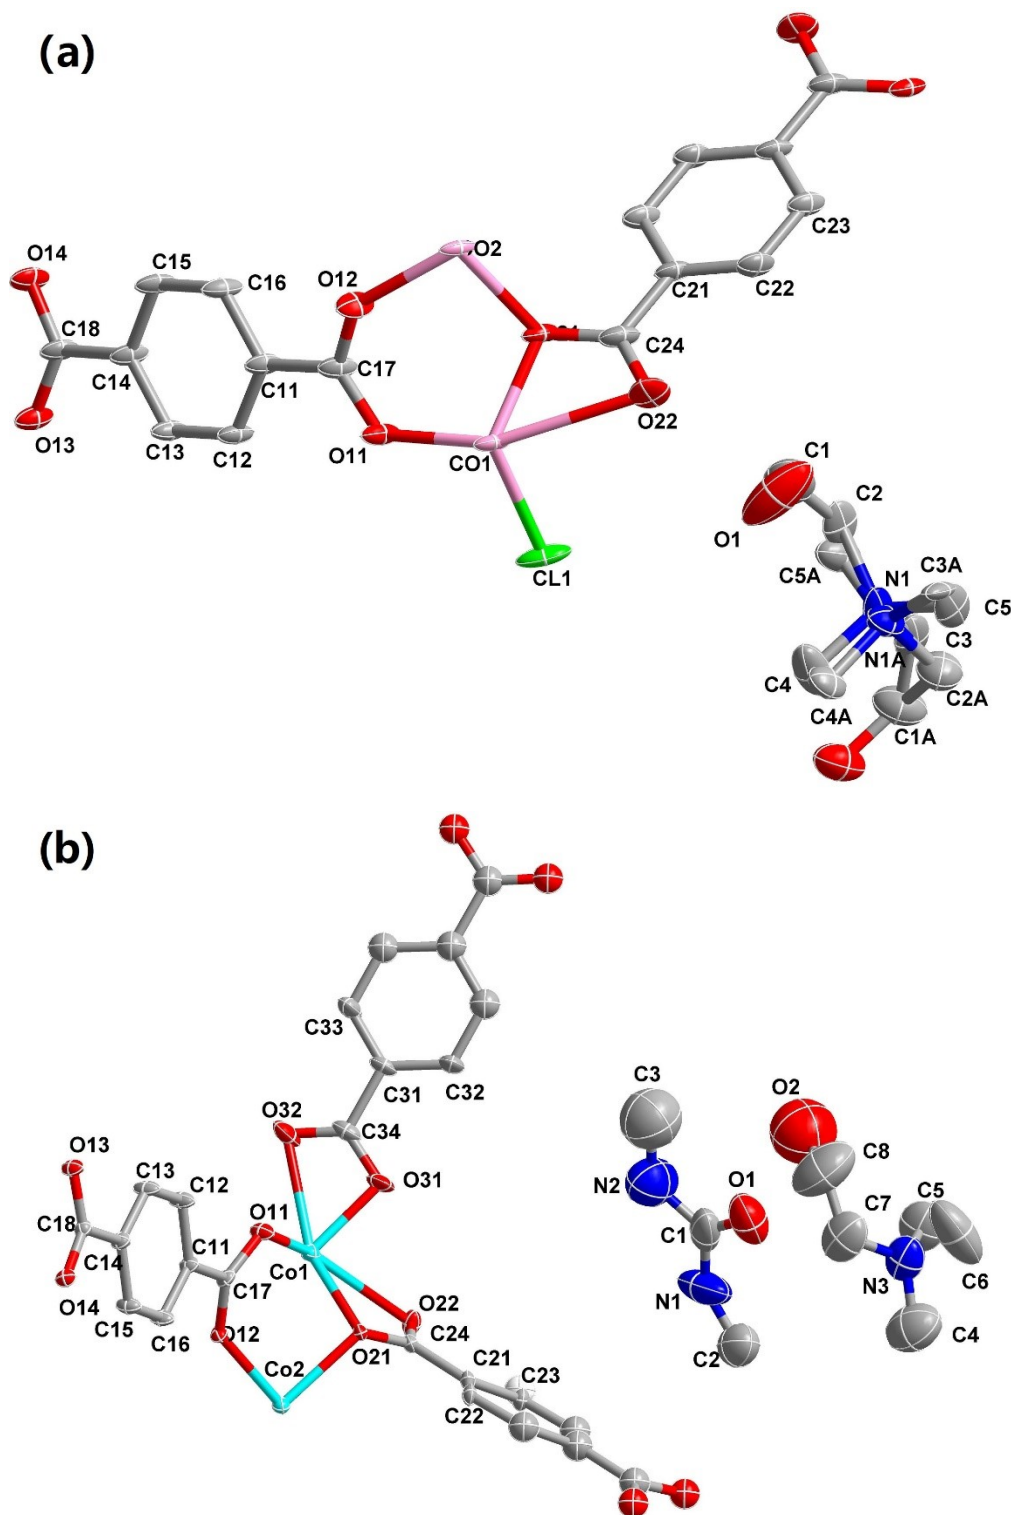

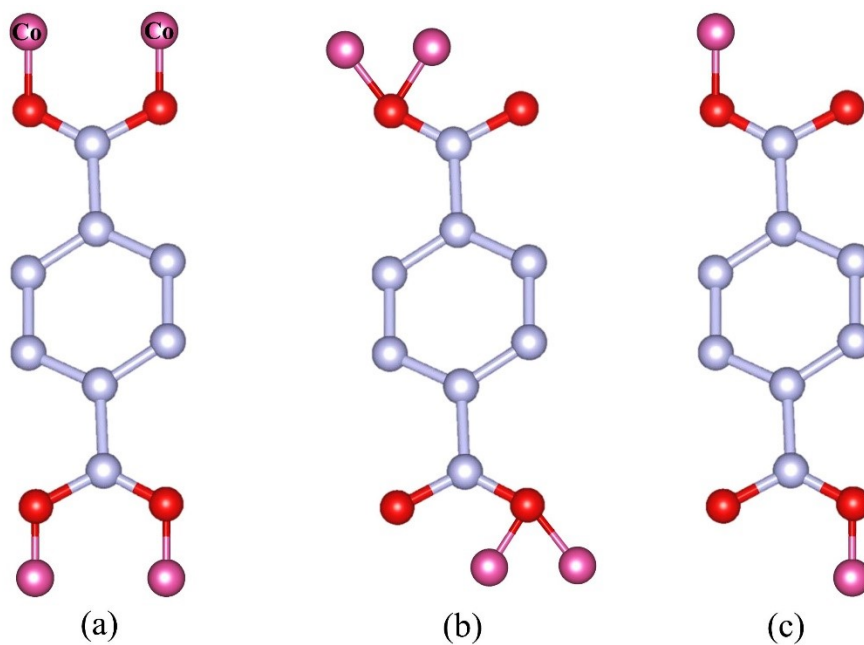

**Fig S2.** Coordination modes of BDC<sup>2-</sup> ligands in **1** and **2**

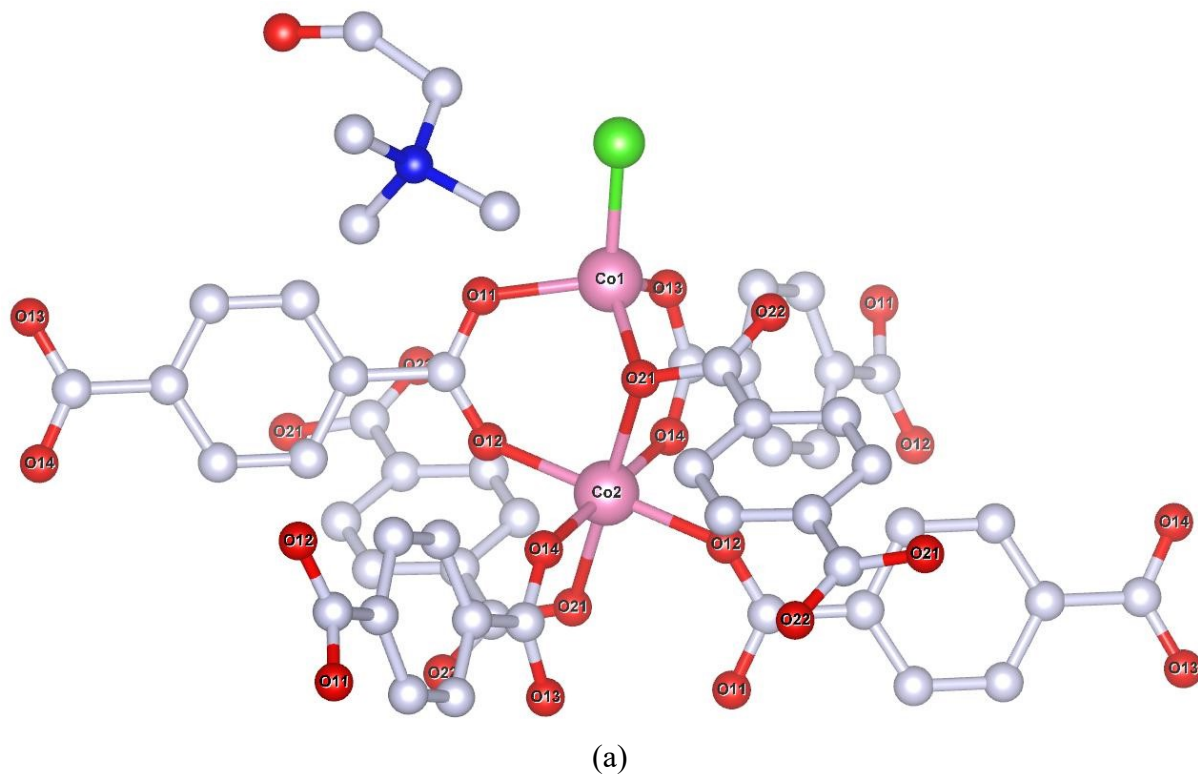

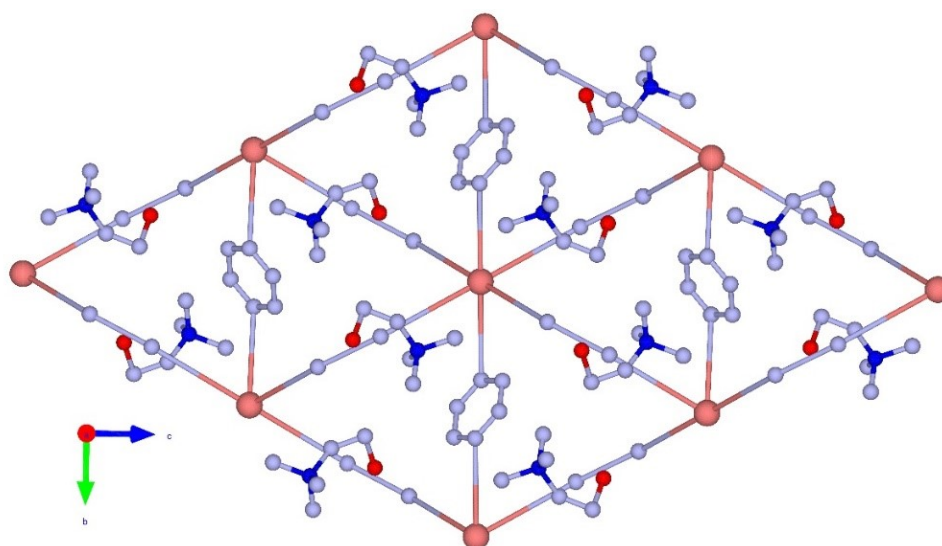

(b)

**Fig. S3.** (a) The coordination spheres of Co(II) centers and (b) the 2D (3,6) layer in **1**.

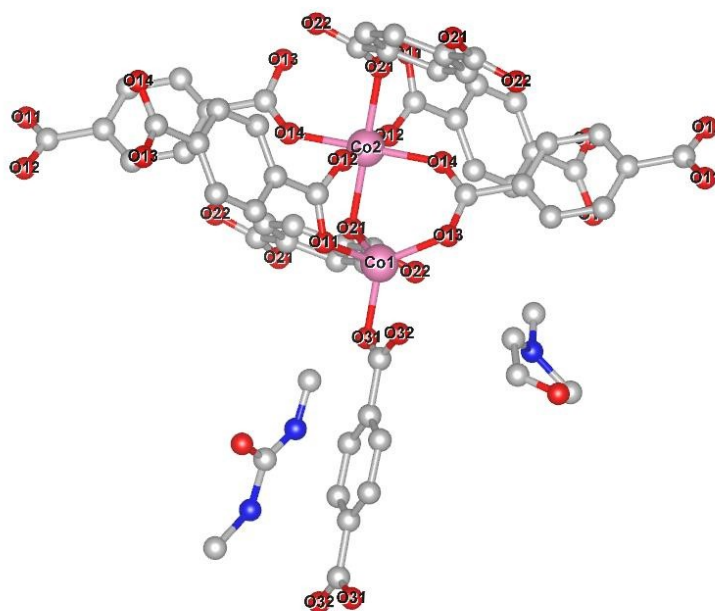

(a)

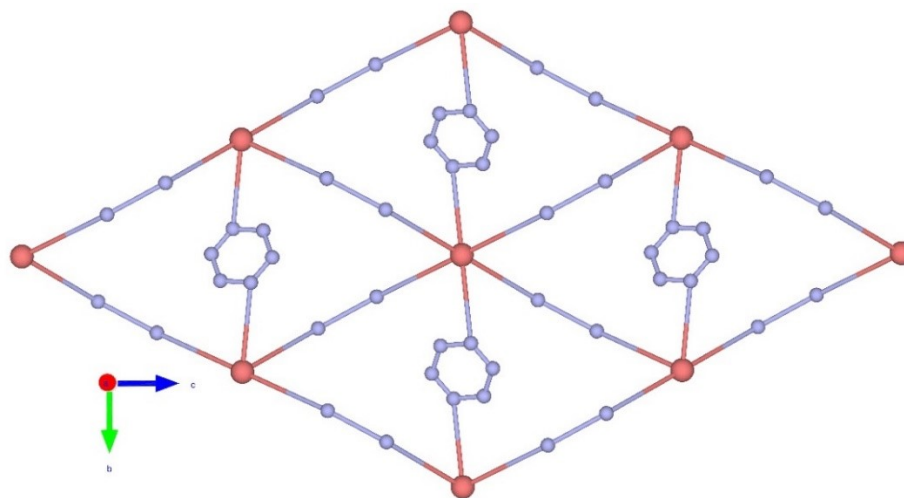

(b)

**Fig. S4.** (a) The coordination spheres of Co(II) centers and (b) the 2D (3,6) layer in **2**.
